# Supplementary material
Source: publisher figshare collection journal article supplement (https://tandf.figshare.com/ndownloader/files/20178020)
Supplement: Supplementary file 1 [file 20178020]

Supplemental Table 1. Description of forest patches.

| **Forest Patch** | **Neighborhood** | **Homeownership** | **Management Regime** | **Number of Interviews** |
| --- | --- | --- | --- | --- |
| Springfield Woods | Pen Lucy | Renter occupied | Community stewardship | 11 |
| HEPP Park | Hamilton Hills | Homeowner occupied | Community stewardship | 11 |
| Glen Oaks - Chinquapin Run | Glen Oaks | Renter occupied | Baltimore City Recreation & Parks | 10 |
| Perring Loch - Chinquapin Run | Perring Loch | Homeowner occupied | Baltimore City Recreation & Parks | 10 |

Supplemental Table 2. Demographic descriptors of interview sample.

|  | *n* |  |  | *n* |
| --- | --- | --- | --- | --- |
| *Gender* |  |  | *Employment* |  |
| Female | 29 |  | Employed | 19 |
| Male | 13 |  | Full Time Student | 3 |
|  |  |  | Employed and in School | 2 |
| *Race/Ethnicity* |  |  | Disability | 3 |
| Black | 31 |  | Unemployed | 2 |
| White | 5 |  | Retired | 13 |
| Other | 6 |  |  |  |
|  |  |  | *Length of Residency* |  |
| *Education Completed* |  |  | < 2 years | 13 |
| Some High School | 4 |  | 2-20 years | 17 |
| High School | 12 |  | > 20 years | 12 |
| Some College* | 17 |  |  |  |
| 4-year College | 5 |  |  |  |
| Graduate School | 4 |  |  |  |

*N* = 42. *Includes vocational or associates degrees.

**Supplemental Material: Interview Protocol**

- How long have you lived here (in this house)?
- What’s it like living in this neighborhood? (Do you like living here?)
  - Do you feel safe in this neighborhood?
  - Can you tell me a bit about how the neighborhood has changed while you’ve lived here?
- Tell me about the woods over there.
  - What do you call that area?
  - How much did living near the woods affect your choice to live here?
- Do you ever go into the woods? Why or why not?
  - What do you (like to) do in the woods?
  - What determines when you go in there?
- Do you see anyone else go in there? If so who? (Gender, age, ethnicity)
  - Why do other people go in there? (or why not?)
  - Who takes care of that area? (are you a member of the organization?)
  - Who should take care of that area?
- Have you noticed any changes in the woods during the time you’ve lived here?
  - Any specific stories / memories (good or bad) about the woods?
- Is there anywhere else that you go in the outdoors?
- Do you ever do any volunteer work in the outdoors?
  - Where?
  - How often?
  - What activities do you participate in?
- Demographic Questions:
  - Are you: Employed? In school? Retired?
  - What level of school did you complete? HS / College / Graduate School
  - What is your age?
  - What do you consider your race or ethnicity?
  - Do you own the house or are you renting?
